# Supplementary material for: Nonsynonymous Substitution Rate Heterogeneity in the Peptide-Binding Region Among Different HLA-DRB1 Lineages in Humans
Source: PubMed Central journal article supplement (PMC4455771; doi:10.1534/g3.114.011726), 2014-05-02
Supplement: supp_g3.114.011726_FigureS1.pdf [file supp_g3.114.011726_FigureS1.pdf]

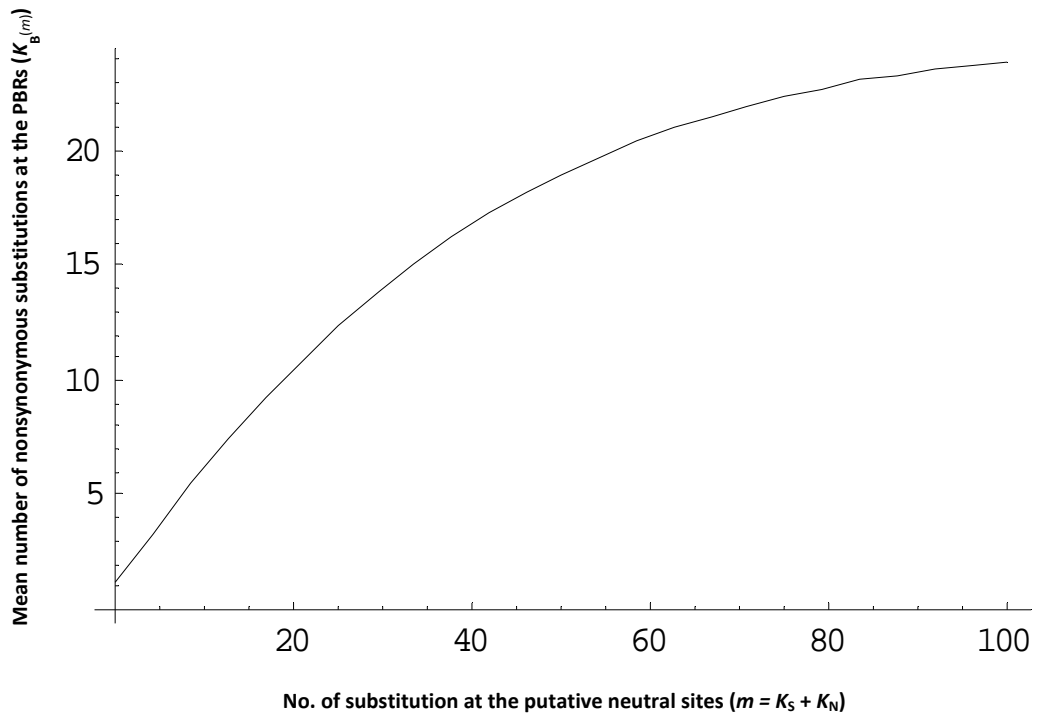

**Figure S1** Expected distribution of  $K_{B(m)}$  values. The pairwise mean number of nonsynonymous substitutions  $K_{B(m)}$  in the PBR conditioned on the number of putative synonymous substitutions  $m$ . This conditional mean number is calculated on the basis of Equation 12 described in Takahata *et al.* (1992).
