# Supplementary material for: Nonsynonymous Substitution Rate Heterogeneity in the Peptide-Binding Region Among Different HLA-DRB1 Lineages in Humans
Source: PubMed Central journal article supplement (PMC4455771; doi:10.1534/g3.114.011726), 2014-05-02
Supplement: supp_g3.114.011726_FigureS2.pdf [file supp_g3.114.011726_FigureS2.pdf]

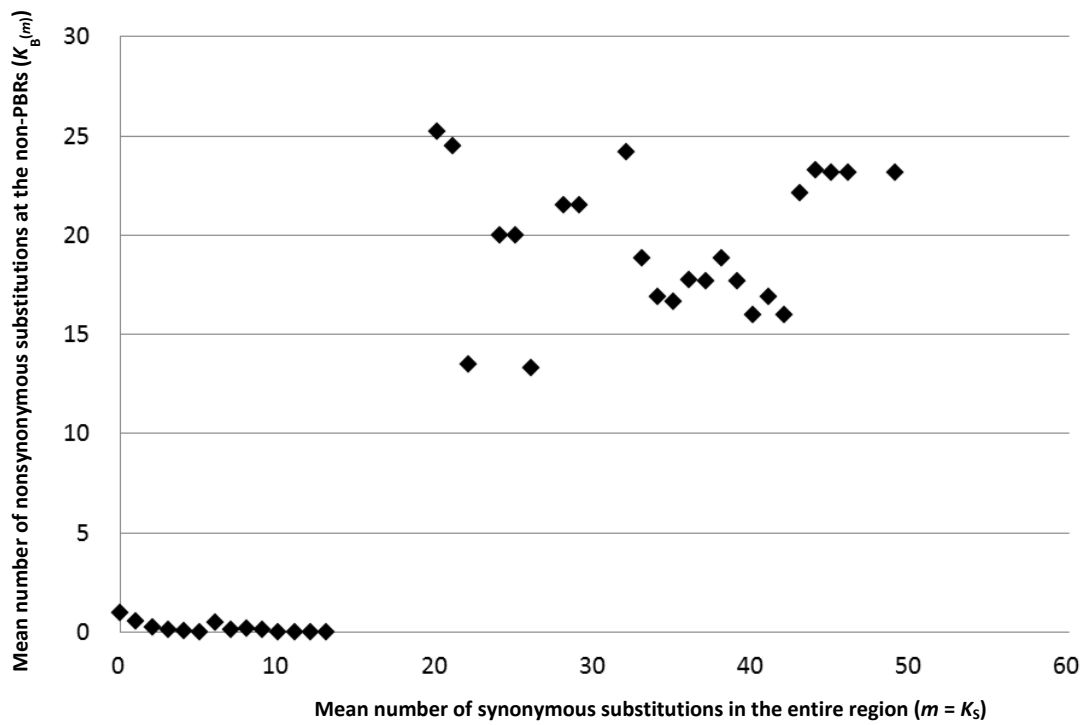

**Figure S2** The relationship of level of amino acid substitutions at the PBR ( $K_{B(m)}$ ) and coalescence time ( $m = K_S$ ) of alleles for 24 rat *RT1-Db1* (*HLA-DRB1* ortholog) alleles. The ordinate axis represents the mean number of nonsynonymous substitutions at the PBR among allele pairs ( $K_{B(m)}$ ). The abscissa axis represents the number of synonymous substitutions over the entire region ( $m = K_S$ ).
