# Supplementary material for: Nonsynonymous Substitution Rate Heterogeneity in the Peptide-Binding Region Among Different HLA-DRB1 Lineages in Humans
Source: PubMed Central journal article supplement (PMC4455771; doi:10.1534/g3.114.011726), 2014-05-02
Supplement: supp_g3.114.011726_FigureS5.pdf [file supp_g3.114.011726_FigureS5.pdf]

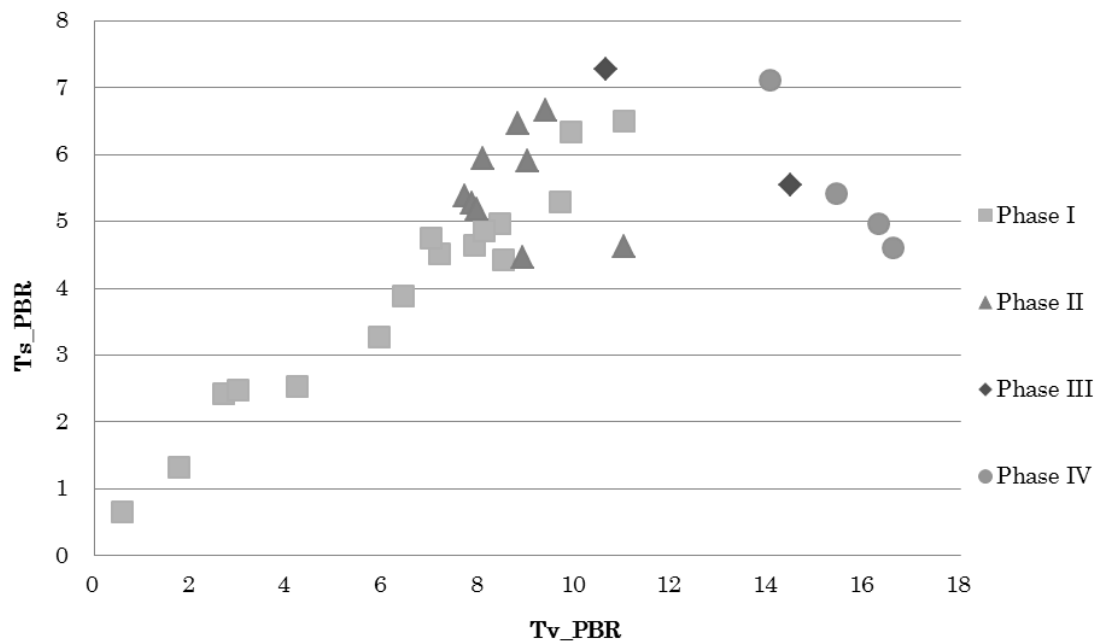

**Figure S5** The number of transition and transversion substitutions at the PBR in *HLA-DRB1* alleles. The abscissa axis represents the mean number of transition substitutions at the PBR among allele pairs. The ordinate axis represents the mean number of transversion substitutions at the PBR.
