# Supplementary material for: Nonsynonymous Substitution Rate Heterogeneity in the Peptide-Binding Region Among Different HLA-DRB1 Lineages in Humans
Source: PubMed Central journal article supplement (PMC4455771; doi:10.1534/g3.114.011726), 2014-05-02
Supplement: supp_g3.114.011726_FigureS6.pdf [file supp_g3.114.011726_FigureS6.pdf]

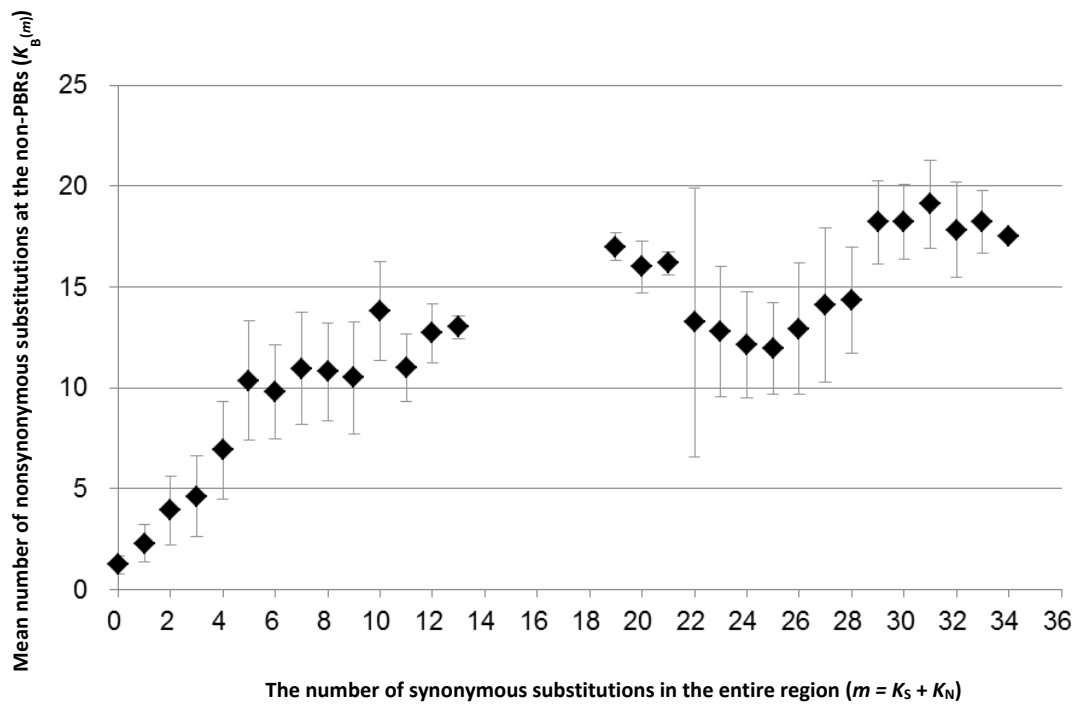

**Figure S6** The level of amino acid substitutions at the PBR ( $K_{B(m)}$ ) among *HLA-DRB1* allele pairs that share the same coalescence time ( $m = K_S + K_N$ ) in a Japanese population. The ordinate axis represents the mean number of nonsynonymous substitutions at the non-PBR among allele pairs ( $K_{B(m)}$ ). The abscissa axis represents the number of putative synonymous substitutions ( $m = K_S + K_N$ ). Error bars indicate the standard deviation from the mean. The  $K_{B(m)}$  and  $m$  values were calculated by using 30 non-recombinant alleles observed in a Japanese population.
